# Supplementary material for: Comprehensive Investigation of Stoichiometry–Structure–Performance Relationships in Flexible Polyurethane Foams
Source: MDPI journal article supplement (doi:10.3390/polym14183813), 2022-09-12
Supplement: s1 [file s1]

# Comprehensive investigation of stoichiometry-structure-performance relationships in flexible polyurethane foams

Adam Olszewski <sup>1</sup>, Paulina Kosmela <sup>1</sup>, Adam Piasecki <sup>2</sup>, Wiktoria Żukowska <sup>1</sup>, Mariusz Szczepański <sup>1</sup>, Paweł Wojtasz <sup>1</sup>, Mateusz Barczewski <sup>3</sup>, Roman Barczewski <sup>4</sup> and Aleksander Hejna <sup>1,\*</sup>

<sup>1</sup> Department of Polymer Technology, Gdańsk University of Technology, Narutowicza 11/12 80-233 Gdańsk, Poland; adam.olszewski@pg.edu.pl (A.O.), paulina.kosmela@pg.edu.pl (P.K.), s177319@student.pg.edu.pl (W.Ż.), s177460@student.pg.edu.pl (P.W.), s177276@student.pg.edu.pl (M.S.), ohejna12@gmail.com (A.H.)

<sup>2</sup> Institute of Materials Engineering, Poznań University of Technology, Jana Pawła II 24, 60-965 Poznań, Poland; adam.piasecki@put.poznan.pl (A.P.)

<sup>3</sup> Institute of Materials Technology, Poznań University of Technology, Piotrowo 3, 61-138 Poznań, Poland; mateusz.barczewski@put.poznan.pl (M.B.)

<sup>4</sup> Institute of Applied Mechanics, Poznań University of Technology, Jana Pawła II 24, 60-965 Poznań, Poland; roman.barczewski@put.poznan.pl (R.B.)

\* Correspondence: ohejna12@gmail.com

**Table S1.** The impact of isocyanate index on tensile strength – regression parameters and statistics.

| Regression parameters        |                     |          | Statistics              |          |
|------------------------------|---------------------|----------|-------------------------|----------|
| Regression type              | linear              |          | Residual Sum of Squares | 732.48   |
| Equation                     | $y = a \cdot x + b$ |          | Total Sum of Squares    | 27992.00 |
| Parameter                    | a                   | b        | R <sup>2</sup> (COD)    | 0.974    |
| Value                        | 509.524             | -357.524 | Adjusted R <sup>2</sup> | 0.969    |
| Standard Error               | 37.352              | 37.631   | Residual Standard       | 12.10    |
| Lower confidence limit (95%) | 413.508             | -454.258 |                         |          |
| Upper confidence limit (95%) | 605.540             | -260.790 |                         |          |

**Table S2.** The impact of isocyanate index on compressive strength at 20% deformation – regression parameters and statistics.

| Regression parameters        |                   |       | Statistics              |         |
|------------------------------|-------------------|-------|-------------------------|---------|
| Regression type              | non-linear        |       | Residual Sum of Squares | 36.02   |
| Equation                     | $y = a \cdot x^b$ |       | Total Sum of Squares    | 2176.17 |
| Parameter                    | a                 | b     | R <sup>2</sup> (COD)    | 0.983   |
| Value                        | 16.916            | 6.899 | Adjusted R <sup>2</sup> | 0.980   |
| Standard Error               | 1.269             | 0.495 | Residual Standard       | 2.68    |
| Lower confidence limit (95%) | 13.654            | 5.627 |                         |         |
| Upper confidence limit (95%) | 20.179            | 8.171 |                         |         |

**Table S3.** The impact of isocyanate index on compressive strength at 50% deformation – regression parameters and statistics.

| Regression parameters |                   |       | Statistics              |          |
|-----------------------|-------------------|-------|-------------------------|----------|
| Regression type       | non-linear        |       | Residual Sum of Squares | 264.88   |
| Equation              | $y = a \cdot x^b$ |       | Total Sum of Squares    | 11580.18 |
| Parameter             | a                 | b     | R <sup>2</sup> (COD)    | 0.977    |
| Value                 | 36.979            | 7.147 | Adjusted R <sup>2</sup> | 0.973    |

|                              |        |       |                   |      |
|------------------------------|--------|-------|-------------------|------|
| Standard Error               | 3.447  | 0.609 | Residual Standard | 7.28 |
| Lower confidence limit (95%) | 28.119 | 5.581 |                   |      |
| Upper confidence limit (95%) | 45.839 | 8.713 |                   |      |

**Table S4.** The impact of isocyanate index on tensile toughness – regression parameters and statistics.

| Regression parameters        |                     |         | Statistics              |        |
|------------------------------|---------------------|---------|-------------------------|--------|
| Regression type              | linear              |         | Residual Sum of Squares | 1.58   |
| Equation                     | $y = a \cdot x + b$ |         | Total Sum of Squares    | 116.70 |
| Parameter                    | a                   | b       | R <sup>2</sup> (COD)    | 0.986  |
| Value                        | 33.111              | -22.152 | Adjusted R <sup>2</sup> | 0.984  |
| Standard Error               | 1.735               | 1.748   | Residual Standard       | 0.56   |
| Lower confidence limit (95%) | 28.652              | -26.644 |                         |        |
| Upper confidence limit (95%) | 37.571              | -17.659 |                         |        |

**Table S5.** The impact of isocyanate index on compressive toughness – regression parameters and statistics.

| Regression parameters        |                   |       | Statistics              |       |
|------------------------------|-------------------|-------|-------------------------|-------|
| Regression type              | non-linear        |       | Residual Sum of Squares | 1.02  |
| Equation                     | $y = a \cdot x^b$ |       | Total Sum of Squares    | 43.62 |
| Parameter                    | a                 | b     | R <sup>2</sup> (COD)    | 0.977 |
| Value                        | 2.122             | 7.510 | Adjusted R <sup>2</sup> | 0.973 |
| Standard Error               | 0.214             | 0.650 | Residual Standard       | 0.45  |
| Lower confidence limit (95%) | 1.572             | 5.838 |                         |       |
| Upper confidence limit (95%) | 2.671             | 9.182 |                         |       |

**Table S6.** The impact of isocyanate index on glass transition temperature – regression parameters and statistics.

| Regression parameters        |                     |         | Statistics              |        |
|------------------------------|---------------------|---------|-------------------------|--------|
| Regression type              | linear              |         | Residual Sum of Squares | 6.00   |
| Equation                     | $y = a \cdot x + b$ |         | Total Sum of Squares    | 469.33 |
| Parameter                    | a                   | b       | R <sup>2</sup> (COD)    | 0.987  |
| Value                        | 66.429              | -48.557 | Adjusted R <sup>2</sup> | 0.985  |
| Standard Error               | 3.380               | 3.404   | Residual Standard       | 1.09   |
| Lower confidence limit (95%) | 57.742              | -57.309 |                         |        |
| Upper confidence limit (95%) | 75.115              | -39.806 |                         |        |
